# Supplementary material
Source: PubMed Central journal article supplement (PMC5373440)
Supplement: ASN.2015101189SupplementaryData.pdf [file ASN.2015101189SupplementaryData.pdf]

## **Clinical History**

### **Family 1**

II:2 had presented aged 10yrs with walking difficulty and pex cavus (figure 1a). A motor axonal neuropathy was found and a diagnosis of Charcot-Marie-Tooth was made. Age 17 she presented with proteinuria (12g/l) and a creatinine of 1141umol/l. There was no evidence of thrombotic microangiopathy at the time of presentation. A renal biopsy demonstrated end-stage changes with diffuse global sclerosis (figure 2 c). She had haemodialysis for 2 years when she had a renal transplant which lasted for 6 years. After a further 5 years on dialysis she had another renal transplant. After 5 years she presented with worsening renal function, low platelets and low haptoglobins. A renal biopsy demonstrated thrombotic microangiopathy (figure 2,d ,e).

The proposita's brother (III:1), 3 aunts (II:1, II:3; II:4) and the maternal grandmother (I:2) do not carry the p.V102D mutation. II:1, II:3; II:4 and III:1 are all heterozygous for the CD46 aHUS risk haplotype. I:2 does not carry this risk factor. I:2, II:1, II:3; II:4 are all heterozygous for the CFH-H3 haplotype while III:1 is homozygous. They do not have proteinuria, or haematuria and have normal renal function. There is no neurological phenotype. There is no information on the maternal grandfather and no DNA was available to test.

### **Family 2**

III:1 presented aged 27 with a creatinine of 172  $\mu$ mol/l and hypertension. At presentation the haemoglobin was 14.2 g/dl and the platelet count  $271 \times 10^9/L$ . The proteinuria at presentation was quantified at 5.8g/24hrs. Within 11 months of presentation she reached ESRF and commenced RRT (figure 2 f, g).

She had a living related transplant from her mother 2 years later and there was delayed graft function due to intra and post operative hypotension. A biopsy at day 6 demonstrated features of acute tubular necrosis. By day 16 her creatinine had fallen to 220  $\mu\text{mol/L}$ . At day 23 she represented with hypertension and fluid overload. She was anaemic (Hb 6.0g/dl), thrombocytopenic (platelet count  $96 \times 10^9/\text{L}$ ) with a blood film demonstrating microangiopathic haemolytic anaemia. Her tacrolimus levels were always within the normal range. A renal transplant biopsy was undertaken demonstrating severe thrombotic microangiopathy and she started plasma exchange (figure 2 h, i). Over the course of the next months she received daily plasma exchange with fresh frozen plasma and a further 2 transplant biopsies demonstrated on-going TMA. Her renal function continued to deteriorate and she recommenced haemodialysis.

The father of III:1, II:2 developed ESRF and underwent renal replacement therapy. He died aged 25. No renal biopsy or further clinical information is available.

III:2 presented age 36 with a creatinine of 492  $\mu\text{mol/l}$  and hypertension. At presentation the haemoglobin was 13.5 g/dl and the platelet count  $390 \times 10^9/\text{L}$ . The proteinuria was quantified at 4.1g/24hrs. Within 7 months of presentation he reached ESRF and commenced RRT. A renal biopsy demonstrated a subacute arterial TMA with fibroproliferative intimal thickening and luminal obliteration in small arteries and arterioles (figure 2 j, k). 12/16 glomeruli were globally sclerosed and one demonstrated segmental sclerosis. The sclerosed glomeruli were hypercellular and showed tubularisation of Bowman's space.

He had a deceased heart beating donor aged 39. The immunosuppressive regime was Cyclosporin, prednisolone and MMF. A renal biopsy was undertaken after 4 years due to a decline in the graft function demonstrating end stage changes with fibrous

obliteration of arteries compatible with a diagnosis of chronic arterial thrombotic microangiopathy or chronic transplant vasculopathy (figure 2 I).

III:2's mother (II:2) was an obligate carrier who died aged 42 of unknown cause. No historical record or DNA is available. III:2's daughter (IV:1) and brother (III:3) do not carry the p.R177H variant and have normal renal function. IV:1 has one copy of aHUS *FH-H3* risk haplotype but has no copies of the *CD46*<sub>GGAAC</sub> risk haplotype. III:3 has one copy of aHUS *FH-H3* risk haplotype but has no copies of the *CD46*<sub>GGAAC</sub> risk haplotype

### **Supplemental Table 1 Complement Antigenic Levels**

|                        | Fm1 II:1 | Fm1 I:2  | Fm2 III:1 | Fm2 III:2 |
|------------------------|----------|----------|-----------|-----------|
| INF 2 mutation         | p.V102D  | p.V102D  | p.R177H   | p.R177H   |
| C3 g/L (0.68-1.38 g/l) | 0.56     | 0.66     | 0.97      | 0.76      |
| C4 g/L (0.18-0.60 g/l) | 0.19     | 0.29     | 0.26      | 0.30      |
| FH g/L (0.35-0.59 g/l) | 0.39     | 0.47     | 0.50      | 0.52      |
| FI mg/L (38-58 mg/L)   | 47       | 61       | 60        | 51        |
| FH auto Ab             | Negative | Negative | Negative  | Negative  |

**Supplemental Table 2 Exome raw data**

|                                                                                  |     | Fm1      |          | Fm2- II:2 |
|----------------------------------------------------------------------------------|-----|----------|----------|-----------|
|                                                                                  |     | I:2      | II:1     |           |
| Total number of reads received                                                   |     | 63413530 | 70865504 | 61141134  |
| Percentage of reads mapped to the reference genome (after removal of duplicates) |     | 75.3     | 85.8     | 96.3      |
| Total mean coverage (x)                                                          |     | 57.9     | 67.6     | 62.4      |
| Percentage of exome Covered                                                      | 1x  | 99.0     | 99.1     | 98.3      |
|                                                                                  | 5x  | 95.9     | 96.7     | 95.5      |
|                                                                                  | 10x | 89.5     | 91.7     | 90.6      |
|                                                                                  | 20x | 70.9     | 76.9     | 80.2      |
|                                                                                  | 40x | 36.2     | 44.4     | 55.3      |

**Supplemental Table 3 Whole exome sequencing filtering results**

| Step                                   | Number of variants het in both |
|----------------------------------------|--------------------------------|
| Total                                  | 230854                         |
| 1. Only exonic (and splicing)          | 17365                          |
| 2. Rare                                | 1924                           |
| 3. Segregates                          | 571                            |
| 4. Deleterious                         | 113                            |
| 5. $\geq 0.1\%$ 1000g ESP6500          | 49                             |
| 6. $< 2$ GERP++ $< 0.5$ PhyloP removed | 34                             |

Deleterious in at least one of 6 predictor programs (Polyphen-2 HDIV and HVAR, Mutation Taster, Mutation Assessor, FATHMM and RadialSVM). The prediction score thresholds used, were based on what has been previously described in the literature (Li *et al.*, 2014; Dong *et al.*, 2015).

Polyphen2 scores of  $\geq 0.453$  or  $\geq 0.447$ , in HDIV and HVAR respectively, were labelled damaging. A score of  $\geq 0.5$  was classed as deleterious. Mutation Assessor scores of  $\geq 0.785$ , were classed as high impact and therefore deleterious. FATHMM scores of  $\geq 0.453$ , were predicted to be deleterious. A RADIAL SVM score of  $\geq 0.5$ , was classed as deleterious.

**Supplemental Table 4 Phenotypic Interogation**

| Chr   | Position  | AAChange | dbSNP138    | GeneName        | Renal Phenotype (Dominant) | Neuro Phenotype (Dominant) |
|-------|-----------|----------|-------------|-----------------|----------------------------|----------------------------|
| chr16 | 16267146  | G928S    | rs142470921 | <i>ABCC6</i>    |                            |                            |
| chr5  | 131308482 | E325K    | rs145869312 | <i>ACSL6</i>    |                            |                            |
| chr17 | 42226378  | G403R    | rs143555103 | <i>C17orf53</i> |                            |                            |
| chr1  | 7724048   | M481V    | rs142884344 | <i>CAMTA1</i>   |                            | •                          |
| chr13 | 111294792 | R498Q    |             | <i>CARS2</i>    |                            |                            |
| chr5  | 177673296 | P458S    | rs200786621 | <i>COL23A1</i>  |                            |                            |
| chr17 | 6684053   | F289S    | rs200774821 | <i>FBXO39</i>   |                            |                            |
| chr1  | 27942346  | A692T    | rs2231878   | <i>FGR</i>      |                            |                            |
| chr9  | 14807956  | P1024T   |             | <i>FREM1</i>    |                            |                            |
| chr16 | 20325981  | A368V    |             | <i>GP2</i>      |                            |                            |
| chr3  | 128780764 | N61S     | rs5030764   | <i>GP9</i>      |                            |                            |
| chr14 | 105168007 | V102D    |             | <i>INF2</i>     | •                          | •                          |
| chr12 | 26774085  | Q1145K   |             | <i>ITPR2</i>    |                            |                            |
| chr3  | 134338075 | R188C    | rs377549995 | <i>KY</i>       |                            |                            |
| chr17 | 44408485  | I1281T   | rs1054818   | <i>LRRC37A</i>  |                            |                            |
| chr17 | 45299776  | Q173R    | rs373421058 | <i>MYL4</i>     |                            |                            |
| chr7  | 45007287  | T567A    | rs61745695  | <i>MYO1G</i>    |                            |                            |
| chr17 | 40695858  | S612G    | rs148881970 | <i>NAGLU</i>    |                            |                            |
| chr3  | 27233566  | N132I    | rs35493524  | <i>NEK10</i>    |                            |                            |
| chr4  | 47850293  | D875N    | rs201648191 | <i>NFXL1</i>    |                            |                            |
| chr6  | 72006495  | Q223K    |             | <i>OGFRL1</i>   |                            |                            |
| chr1  | 248059744 | N286H    |             | <i>OR2W3</i>    |                            |                            |
| chr7  | 148716271 | Q144H    |             | <i>PDIA4</i>    |                            |                            |
| chr7  | 148718104 | F123S    |             | <i>PDIA4</i>    |                            |                            |
| chr4  | 25260763  | Q287H    | rs143048917 | <i>PI4K2B</i>   |                            |                            |
| chr1  | 20964372  | P142L    |             | <i>PINK1</i>    |                            | •                          |
| chr1  | 14109023  | P1377L   | rs148083107 | <i>PRDM2</i>    |                            |                            |
| chr12 | 15734706  | W55G     |             | <i>PTPRO*</i>   |                            |                            |
| chr16 | 24580389  | R660H    | rs371006887 | <i>RBBP6</i>    |                            |                            |
| chr22 | 44385092  | T183A    |             | <i>SAMM50</i>   |                            |                            |
| chr5  | 145435759 | R513Q    | rs141349885 | <i>SH3RF2</i>   |                            |                            |
| chr10 | 90676486  | A152V    | rs140820995 | <i>STAMBPL1</i> |                            |                            |
| chr17 | 42092230  | C31G     | rs139186093 | <i>TMEM101</i>  |                            |                            |
| chr7  | 100371479 | R1923P   | rs71555302  | <i>ZAN</i>      |                            |                            |

**Supplemental Table 5 *INF2* primers and conditions**

| Exon  | Forward              | Reverse              | PCR product size (bp) | Annealing temperature (°C) |
|-------|----------------------|----------------------|-----------------------|----------------------------|
| 2     | TGGTGGCCAGGAGGACA    | CTGAAGCCTCATACCAGGTC | 524                   | 55                         |
| 3/4   | TGCACAGGCATGGGAAG    | ATGCACTGGCCAAGAGGC   | 466                   | 55                         |
| 5.1   | CTCTGGGTGGCAGAAGTGA  | CCTTGTTCTAGTGGGCCTG  | 570                   | 63                         |
| 5.2   | GGACGCAAGATGGAGACA   | ACCTGAATGAACTGCATG   | 550                   | 55                         |
| 6     | TGGTACACTGGCGCTGAC   | CCCAGCCTCTGGACCTCA   | 300                   | 60                         |
| 7     | CACAGTCCTTAGTCCACCA  | GACCTCAGTGTCTGCCCA   | 260                   | 60                         |
| 8.1   | CTTCTCCCTTGACCCCTGGA | CCAGGCCTGGCAGGGGTG   | 448                   | 60                         |
| 8.2   | TAAGGCCCTCCCAACAGCA  | TCTCCCCAGCAGAGACCAG  | 448                   | 60                         |
| 9/10  | ACATCCTTTAGACCCTCT   | CCCAAGTCAGAAGGCTCA   | 464                   | 55                         |
| 11    | CTCGACTGTTCTGTGTCC   | CCTGTGGCTCACGGTTCA   | 377                   | 60                         |
| 12    | TGAACCGTGAGCCACAGG   | TTGGCACAGCCTTCTC     | 305                   | 55                         |
| 13    | CAGAGCCCTGTGCTGAGT   | CAGCCATTATGATACTGGC  | 284                   | 55                         |
| 14/15 | GCTCCGAACCAAGAGCCC   | ATGGGGGTATGGCCTCTAC  | 379                   | 60                         |
| 16    | GACCTTAATTGCTAAGGG   | TGCGCTGCAGCTGTGAGA   | 282                   | 55                         |
| 17    | TCAGAGTACAGCCTGCAGG  | AGACAGCACAGCCACTCG   | 320                   | 60                         |
| 18    | CTCTCACGGGACTGTCA    | AAAGGTGCCTCTGCCCAT   | 291                   | 60                         |
| 19/20 | CGACACAGCCATGTGGGC   | GACCATGAGGAGGCAGTG   | 546                   | 60                         |
| 21.1  | GGGCGTTCAGGTAGACAG   | CTCGTCCTCGTCCTCATC   | 582                   | 55                         |
| 21.2  | GAGGCCGACAGCACAAGTG  | TCCTGGGTGCCGCTGGAAC  | 371                   | 55                         |
| 22    | GAGTCAGGGTTGCTTCTG   | AGAAGCCAGGTTAGTGTC   | 217                   | 55                         |

Dong, C., Wei, P., Jian, X., Gibbs, R., Boerwinkle, E., Wang, K. and Liu, X. (2015) 'Comparison and integration of deleteriousness prediction methods for nonsynonymous SNVs in whole exome sequencing studies', *Hum Mol Genet*, 24(8), pp. 2125-37.

Li, Q., Liu, X., Gibbs, R.A., Boerwinkle, E., Polychronakos, C. and Qu, H.-Q. (2014) 'Gene-Specific Function Prediction for Non-Synonymous Mutations in Monogenic Diabetes Genes', *PLoS One*, 9(8), p. e104452.
